# Supplementary material for: Correction: Closing the balance – on the role of integrating biorefineries in the future energy system
Source: Royal Society of Chemistry journal article supplement (doi:10.1039/d3se90081a), 2023-01-01
Supplement: d3se90081a1.pdf [file d3se90081a1.pdf]

1 Supplementary information for: Closing the balance - on the role of  
2 integrating biorefineries in the future energy system

3 Julia Granacher<sup>1\*</sup>, Rafael Castro-Amoedo<sup>1</sup>, Jonas Schnidrig<sup>1</sup>, François Maréchal<sup>1</sup>

4 10th July 2023

5 <sup>1</sup>Industrial Process and Energy Systems Engineering group, École Polytechnique Fédérale de Lausanne,  
6 Rue de l'Industrie 17, 1950 Sion, Switzerland;

7 \*julia.granacher@epfl.ch

8 **Contents**

|    |                                                                                  |           |
|----|----------------------------------------------------------------------------------|-----------|
| 9  | <b>A Supplementary information on the superstructure model</b>                   | <b>2</b>  |
| 10 | A.1 Thermoechemical conversion pathways . . . . .                                | 2         |
| 11 | A.2 Fuel cell and co-electrolysis . . . . .                                      | 6         |
| 12 | A.3 Carbon capture, mineralization, and geological sequestration . . . . .       | 6         |
| 13 | A.4 Residential district . . . . .                                               | 8         |
| 14 | A.5 Demands of residential district . . . . .                                    | 11        |
| 15 | <b>B Supplementary information on parameter space and the solution synthesis</b> | <b>12</b> |
| 16 | B.1 Mathematical formulation . . . . .                                           | 12        |
| 17 | B.2 Complexity reduction by means of time series aggregation . . . . .           | 14        |
| 18 | B.3 Parameter sampling and time-dependency . . . . .                             | 15        |
| 19 | B.4 Country-specific data . . . . .                                              | 18        |
| 20 | <b>C Supplementary information on the results</b>                                | <b>20</b> |
| 21 | <b>D Design references</b>                                                       | <b>20</b> |

## 22 A Supplementary information on the superstructure model

23 In the following, supplementary material on the characteristics of the superstructure is provided. Detailed  
 24 descriptions of the considered superstructure for combined pulp and fuel production, including the Kraft  
 25 pulp mill, thermochemical conversion pathways and fuel synthesis models are available in [1], the following  
 26 provides a summary of the process model parameters.

Table 1: Kraft pulp mill.

|                                          | Unit                            | Value | References   |
|------------------------------------------|---------------------------------|-------|--------------|
| <b>Pulp mill</b>                         |                                 |       |              |
| Pulp production                          | adt/day                         | 1000  | [2]          |
| Black liquor stream                      | kg/s for 1000 adt<br>pulp/day   | 14.89 | [2]          |
| Bark stream                              | kW bark/adt<br>pulp             | 33.5  | [3]          |
| <b>Lime kiln and chemical recovery</b>   |                                 |       | [4, 5]       |
| $T_{\text{calcination}}$                 | $^{\circ}\text{C}$              | 900   | [4, 5]       |
| $T_{\text{product}}$                     | $^{\circ}\text{C}$              | 300   | [6]          |
| Reburn specific heat                     | J/kg/K                          | 989   | [4]          |
| CO <sub>2</sub> specific heat            | J/kg/K                          | 919   | [4]          |
| Heat of calcination                      | kJ/kg                           | 3270  | [4]          |
| Inerts specific heat                     | J/kg/K                          | 1046  | [4]          |
| Availability                             | %                               | 85    | [6]          |
| Dust loss                                | %                               | 5     | private data |
| Solid content                            | %                               | 73.5  | private data |
| Enthalpy of evaporation                  | kJ/kg                           | 2439  | [4]          |
| Na <sub>2</sub> CO <sub>3</sub> in smelt | g/kg dry solids<br>black liquor | 278.3 | [7]          |
| Shell losses in kiln                     | % of heat input                 | 15    | [8]          |

### 27 A.1 Thermochemical conversion pathways

Table 2: Black liquor gasification.

|                                              | Unit                | Value                    | References  |
|----------------------------------------------|---------------------|--------------------------|-------------|
| <b>Gasification of black liquor</b>          |                     |                          |             |
| <b>Hydrolysis</b>                            |                     |                          | [9]         |
| Lignin fraction in organic biomass           | wt % <sub>DAF</sub> | 94                       |             |
| H/C-ratio of lignin                          | mol <sub>DAF</sub>  | 1.11                     |             |
| O/C-ratio of lignin                          | mol <sub>DAF</sub>  | 0.33                     |             |
| Effective water content                      | wt%                 | 93                       |             |
| <b>Decomposition of carboxylic salts</b>     |                     |                          | [10],[11]   |
| Reactor yield                                | -                   | 0.7                      |             |
| <b>Salt separator</b>                        |                     |                          | [12]        |
| Recovery of inorganic cooking chemicals      | %                   | 100                      | [13]        |
| Organic losses in salt brine                 | %                   | 10                       | [9]         |
| <b>Hydrothermal Gasification</b>             |                     |                          | [9]         |
| Reactor temperature                          | °C                  | 700                      | [14]        |
| Reactor pressure                             | bar                 | 250                      | [15]        |
| Gas expander isentr. efficiency              | -                   | 0.8                      | [15]        |
| Liquid expander isentr. efficiency           | -                   | 0.82                     | [15]        |
| <b>Pressure Swing adsorption (PSA)</b>       |                     |                          | [16]        |
| Recovery                                     | %                   | 52                       |             |
| Purity                                       | mol%                | 99.996                   |             |
| Number of beds                               | -                   | 4                        |             |
| Operating pressure                           | bar                 | 30                       | [17]        |
| Operating temperature                        | °C                  | 25                       | [18]        |
| Adsorbent                                    |                     | Activated carbon/zeolite |             |
| <b>Selexol and Pressure Swing adsorption</b> |                     |                          | [9, 17, 19] |
| Pressure selexol/ PSA                        | bar                 | 70/ 30                   |             |
| Temperature selexol/ PSA                     | °C                  | 25                       |             |
| Recovery H <sub>2</sub> selexol              | %                   | 100                      |             |
| Recovery H <sub>2</sub> PSA                  | %                   | 80                       |             |
| Number of beds PSA                           | -                   | 6                        |             |
| Purity                                       | mol %               | 99.997                   |             |
| <b>COS hydrolysis</b>                        |                     |                          | [20]        |
| Temperature                                  | °C                  | 220                      |             |

|                                                |     |                          |
|------------------------------------------------|-----|--------------------------|
| Pressure                                       | bar | depending on AGR unit    |
| <b>Warm-Temperature Syngas Desulfurization</b> |     | <a href="#">[21, 22]</a> |
| Temperature                                    | °C  | 330                      |
| Pressure                                       | bar | 30                       |

Table 3: Thermochemical conversion pathways of bark.

|                                                                     | Unit                  | Value                           | References |
|---------------------------------------------------------------------|-----------------------|---------------------------------|------------|
| <b>Pretreatment</b>                                                 |                       |                                 | [23–26]    |
| Drying technology                                                   | -                     | Steam/air drying                |            |
| Moisture content after drying                                       | %                     | 10 (FT) /<br>20                 |            |
| <b>Gasification</b>                                                 |                       |                                 | [23–26]    |
| Operating conditions (T,p), agent, steam to dry biomass ratio       |                       |                                 |            |
| Directly heated entrained flow (ENF)                                | °C, bar, -,-          | 1350, 30, oxygen-steam, 0.6     |            |
| Directly heated circulating fluidized bed (CFB)                     | °C, bar, -,-          | 850,1, oxygen-steam, 0.6        |            |
| Indirectly heated fast internally circulating fluidized bed (FICFB) | °C, bar, -,-          | 850,1, oxygen-steam, 0.5        |            |
| <b>Gas conditioning</b>                                             |                       |                                 | [23–26]    |
| Gas cleaning technology                                             | -                     | cold/hot                        |            |
| Gas cleaning temperature                                            | °C                    | 150 / 850                       |            |
| Gas cleaning filter pressure drop                                   | mbar                  | 1000                            |            |
| Gas cleaning flash temperature                                      | °C                    | 25                              |            |
| water gas shift (WGS) temperature                                   | °C                    | 300                             |            |
| CO <sub>2</sub> removal                                             | -                     | MEA                             | [27]       |
| MEA heat requirements                                               | MJ/kg CO <sub>2</sub> | 3.3 (at 150°C, 20% recoverable) |            |
| MEA electricity requirements                                        | kJ/kg CO <sub>2</sub> | 25                              |            |
| <b>Fuel synthesis</b>                                               |                       |                                 | [23–26]    |
| <b>Operating conditions</b>                                         |                       |                                 |            |
| Fischer-Tropsch (FT) synthesis pressure, temperature                | bar, °C               | 25,220                          |            |
| dimethyl ether (DME) synthesis pressure, temperature                | bar, °C               | 50,277                          |            |
| methanol synthesis pressure, temperature                            | bar, °C               | 85,315                          |            |
| synthetic natural gas (SNG) synthesis pressure, temperature         | bar, °C               | 5,327                           |            |
| <b>Technology and catalyst</b>                                      |                       |                                 |            |

|                                               |                                                                            |
|-----------------------------------------------|----------------------------------------------------------------------------|
| FT synthesis                                  | Multi tubular fixed bed reactor, Co/Zr/SiO <sub>2</sub>                    |
| DME synthesis                                 | Slurry phase reactor , ACZ, HZSM-5                                         |
| Methanol synthesis                            | Multi-stage fixed bed reactor , Cu/ZnO/Al <sub>2</sub> O <sub>3</sub>      |
| SNG synthesis                                 | Internally cooled fluidized bed reactor , NiAl <sub>2</sub> O <sub>3</sub> |
| <hr/>                                         |                                                                            |
| <b>Upgrading</b>                              | [23–26]                                                                    |
| <hr/>                                         |                                                                            |
| FT upgrading                                  | Private data                                                               |
| DME upgrading                                 | Flash distillation                                                         |
| Methanol upgrading                            | Flash distillation                                                         |
| SNG upgrading                                 | Membranes, PSA                                                             |
| <hr/>                                         |                                                                            |
| <b>Fuel specifications</b>                    | [23–26]                                                                    |
| <hr/>                                         |                                                                            |
| FT specification, temperature, pressure       | -, °C , bar      Liquid fuels, 25, 1                                       |
| DME specification, temperature, pressure      | -, °C , bar      99.8 vol%, 25, 1                                          |
| Methanol specification, temperature, pressure | -, °C , bar      99.4 vol%, 25, 1                                          |
| SNG specification, temperature, pressure      | -, °C , bar      96 vol%, 25, 50                                           |
| <hr/>                                         |                                                                            |

## 28 A.2 Fuel cell and co-electrolysis

29 Table 4 summarizes the key modeling assumptions for the electrolysis and fuel cell models added to the  
30 superstructure.

## 31 A.3 Carbon capture, mineralization, and geological sequestration

32 The models for direct and indirect mineralization are adapted from Ostovari, Sternberg and Bardow [31]  
33 and Spínola et al. [32], considering serpentine as possible feedstock to complement residues from the mill.  
34 Hereafter, the main process modeling assumptions are summarized; details on the adapted simulation  
35 models can be found in [33].

Table 4: SOEC/SOFC units.

|                                     | Unit                  | Value | Reference |
|-------------------------------------|-----------------------|-------|-----------|
| <b>Alkaline electrolysis</b>        |                       |       |           |
| Water in                            | kg/s                  | 0.080 | [28]      |
| Hydrogen out                        | kg/s                  | 0.069 | [28]      |
| Oxygen out                          | kg/h                  | 0.170 | [28]      |
| Electricity in                      | kWh                   | 1000  | [28]      |
| System efficiency                   | kWe/kg H <sub>2</sub> | 52    | [28]      |
| <b>Solide oxide Co-electrolysis</b> |                       |       | [29]      |
| Water inlet                         | kg/s                  | 1.533 |           |
| CO <sub>2</sub> input               | kg/s                  | 2.64  |           |
| Syngas produced                     | kg/s                  | 3.011 |           |
| Oxygen co-produced                  | kg/s                  | 1.162 |           |
| Electricity input                   | kW                    | 18336 |           |
| <b>Solide oxide fuel cell</b>       |                       |       | [30]      |
| F <sup>min</sup>                    | kWe                   | 250   |           |
| CH <sub>4</sub> in                  | kg/s                  | 1     |           |
| CO <sub>2</sub> out                 | kg/s                  | 2.75  |           |
| $\eta^{\text{elec}}$                | %                     | 75    |           |

Table 5: Direct mineralization.

|                                               | Unit | Value | Reference |
|-----------------------------------------------|------|-------|-----------|
| <b>Grinding and magnetic separation</b>       |      |       | [31, 34]  |
| Serpentine in                                 | t    | 2.3   |           |
| Electricity demand                            | kWh  | 190   |           |
| Magnetic material out                         | t    | 0.2   |           |
| <b>Carbonation reactor and postprocessing</b> |      |       | [31, 34]  |
| Operating temperature                         | °C   | 155   |           |
| Operating pressure                            | bar  | 140   |           |
| MgCO <sub>3</sub> out                         | t    | 1.9   |           |
| SiO <sub>2</sub> out                          | t    | 0.9   |           |
| Solvent recovery rate                         | %    | 90    |           |

Table 6: Indirect mineralization.

|                                                         | Unit | Value | Reference |
|---------------------------------------------------------|------|-------|-----------|
| <b>Grinding and Phase 1 reactor: mineral extraction</b> |      |       | [31, 34]  |
| Serpentine in                                           | t    | 3.9   |           |
| Electricity demand                                      | kWh  | 63    |           |
| Ammonium sulfate makeup                                 | t    | 0.3   |           |
| <b>Phase 2 reactor: hydroxide formation</b>             |      |       | [31, 34]  |
| Operating temperature                                   | °C   | 50    |           |
| Operating pressure                                      | bar  | 0.5   |           |
| <b>Phase 3 reactor: carbonation and postprocessing</b>  |      |       | [31, 34]  |
| Operating temperature                                   | °C   | 300   |           |
| Operating pressure                                      | bar  | 25    |           |
| MgCO <sub>3</sub> out                                   | t    | 2     |           |

36 Carbon capture is modeled as a blackbox model of monoethanolamine (MEA) with specific heat and  
37 electricity requirements and performance indicators from Heyne and Harvey [27]. For geological sequest-  
38 ration, compression of CO<sub>2</sub> to high-pressure levels for transportation is required. The costs for transport  
39 and storage are provided in Table 14. Sequestration and MEA modeling assumptions are summarized in  
40 Table 7.

Table 7: Carbon capture and sequestration.

|                                          | Unit                       | Value                 | Reference |
|------------------------------------------|----------------------------|-----------------------|-----------|
| <b>CO<sub>2</sub> capture technology</b> |                            |                       | [27]      |
| Electricity demand                       | kJ/kg CO <sub>2</sub>      | 25                    |           |
| Heat demand, temperature                 | MJ/kg CO <sub>2</sub> , °C | 3.3, 150 <sup>a</sup> |           |
| CO <sub>2</sub> /water removal rate      | %                          | 95                    |           |
| <b>Sequestration</b>                     |                            |                       |           |
| Pressure                                 | bar                        | 60                    | [35]      |

<sup>a</sup>20% of heat are recoverable between 90 and 40°C [27].

#### 41 A.4 Residential district

42 Table 8 provides information about the heating technology units and the photovoltaic units. The invest-  
43 ment costs for the installation of the district heating network (DHN) are calculated using the approach  
44 provided in [36] with specific cost data from Belfiore [37], and average heat loss assumptions from Masatin,



45 Latõšev and Volkova [38]. Two types of district heating networks are considered in the superstructure, a  
46 fourth generation, medium-temperature water district heating network, operating at supply and return  
47 temperatures of 60 °C and 30 °C, respectively, as well as an innovative fifth-generation district heating  
48 network, operating on CO<sub>2</sub> as the working fluid with supply and return temperatures of 15 °C and 13 °C.  
49 Both DHN models are adapted from RA Suciu [36].  
50 For providing the heat at the required temperature levels for space heating and domestic hot water  
51 demands, heat pumps can be installed at the district level; the models are adapted from RA Suciu [36]  
52 and Henchoz et al. [39]. The network is balanced using a central plant that exchanges heat with the  
53 pulp mill and can provide additional heat to the DHN by heat pumping (CO<sub>2</sub> network, heat pump  
54 model adapted from RA Suciu [36]) or a conventional boiler operation (water network, boiler model  
55 adapted from [40]). The residential district model is limited by simplifications regarding temperatures of  
56 the demands and their dependency on external conditions. For modeling transportation efficiencies, the  
57 assumption in Table 9 are used. Table 10 provides the energy content of the fuels used for the analysis of  
58 the transportation demands, further elaborated the main article.

Table 8: District model characteristics.

|                                                                   | Unit             | Value                    | Reference    |
|-------------------------------------------------------------------|------------------|--------------------------|--------------|
| <b>District heating network</b>                                   |                  |                          | [30, 39, 41] |
| Water network, $T^{\text{supply}}$ , $T^{\text{return}}$          | °C               | 60, 30                   |              |
| CO <sub>2</sub> network $T^{\text{supply}}$ , $T^{\text{return}}$ | °C               | 15, 13                   |              |
| CO <sub>2</sub> network pressure                                  | bar              | 50                       |              |
| <b>Conventional heating system</b>                                |                  |                          |              |
| Fuel split in commune heating                                     | %                | 20/40/40 (gas/oil/other) | [42]         |
| Efficiency gas boiler                                             | %                | 95                       | [43]         |
| <b>Photovoltaic</b>                                               |                  |                          | [36, 44]     |
| $T^{\text{a}}$                                                    | °C               | 15                       |              |
| $T^{\text{ref}}$                                                  | °C               | 25                       |              |
| $U^{\text{glass}}$                                                | W/m <sup>2</sup> | 29.1                     |              |
| Solar irradiation through PV glass $f^{\text{glass}}$             | -                | 0.9                      |              |
| Efficiency $\eta^{\text{pv,ref}}$                                 | -                | 0.14                     |              |
| $\eta^{\text{pv,variation}}$                                      | -                | 0.001                    |              |
| Electricity provision <sup>a</sup> , $E^{-\text{PV}}$             | kW               | 1.66                     |              |

<sup>a</sup>for reference area of A=100 m<sup>2</sup> and irradiation I=100 W/m<sup>2</sup>.

Table 9: Efficiency of transport mediums.

| Modelling assumptions | Unit    | Value | Reference |
|-----------------------|---------|-------|-----------|
| in 2019               |         |       | [45]      |
| Fuel-powered car      | MJ/pkm  | 1.78  |           |
| Electric car          | kWh/vkm | 0.17  | [46]      |
| Bus                   | MJ/pkm  | 1.01  |           |
| Freight               | MJ/tkm  | 2.74  |           |
| in 2030 <sup>a</sup>  |         |       |           |
| Fuel-powered car      | MJ/pkm  | 0.98  |           |
| Electric car          | kWh/vkm | 0.17  | [46]      |
| Bus                   | MJ/pkm  | 0.56  |           |
| Freight               | MJ/tkm  | 1.51  |           |

<sup>a</sup>assuming linear efficiency improvement from [47].

Table 10: lower heating value (LHV) and exergy of products and fuels<sup>a</sup>.

| Product  | LHV [MJ/kg] | Exergy [MJ/kg] |
|----------|-------------|----------------|
| FT fuel  | 44.81       | 47.94          |
| Methanol | 19.83       | 21.22          |
| DME      | 28.83       | 30.84          |
| SNG      | 47.89       | 52.12          |
| Hydrogen | 119.70      | 116.50         |
| Pulp     | 8.15        | 9.21           |
| Diesel   | 42.61       | NA             |
| Gasoline | 43.45       | NA             |
| Nat. gas | 50.02       | NA             |

<sup>a</sup>LHV based on flowsheeting results, exergy calculated with factors provided in [48].

## 59 A.5 Demands of residential district

60 The average transportation demand is summarized in Table 11, information on the heating and electricity  
 61 demands of the district, as well as the weather data is provided in Table 12 for average annual data. In  
 62 Figure 1, samples of the hourly demand profiles included in the model are presented and normalized on  
 63 the respective annual averages.

Table 11: Shares of passenger vehicles in France for 2019 and 2030.

| Value       | Unit | Commodity              | Reference            |
|-------------|------|------------------------|----------------------|
| <b>2019</b> |      |                        | <a href="#">[49]</a> |
| 27          | %    | Gasoline               |                      |
| 71          | %    | Diesel                 |                      |
| 2           | %    | Electricity and others |                      |
| <b>2030</b> |      |                        | <a href="#">[50]</a> |
| 16          | %    | Gasoline               |                      |
| 24          | %    | Diesel                 |                      |
| 60          | %    | Electricity and others |                      |

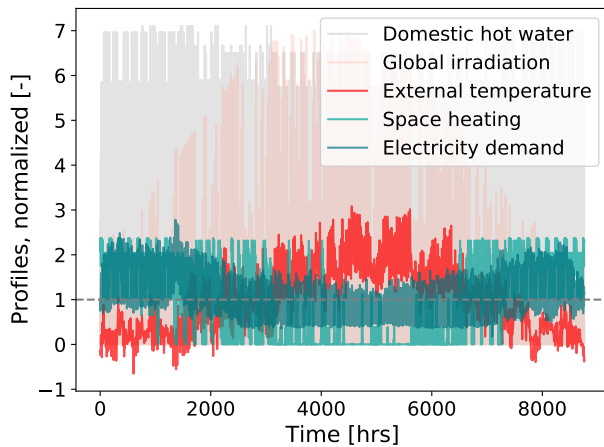

(a) Hourly profile, one year

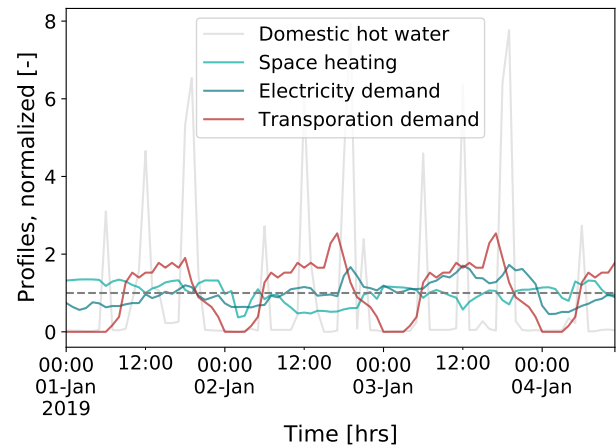

(b) Hourly profile, four days

Figure 1: Hourly district demands and weather data profiles for one year, adapted from Middelhauve [51], PM Stadler [52] and Cedric Terrier, Luise Middelhauve and François Maréchal [53].

Table 12: District demands and weather data.

|                                                      | Unit             | Value                | Reference |
|------------------------------------------------------|------------------|----------------------|-----------|
| <b>Size and demands<sup>a</sup></b>                  |                  |                      | [51, 52]  |
| Reference size district                              | capita           | 568                  |           |
| Scaling factor district                              | -                | 300/150 <sup>b</sup> |           |
| <b>Annual average demands per capita<sup>a</sup></b> |                  |                      |           |
| Domestic hot water demands                           | kWh              | 630                  | [51, 52]  |
| Space heating demand                                 | kWh              | 4080                 | [51, 52]  |
| Electricity demand                                   | kWh              | 1200                 | [51, 52]  |
| Personal transport demand                            | pkm              | 10800                | [53]      |
| Freight transport demand                             | tkm/yr           | 4300                 | [54]      |
| Public transport demand                              | pkm/yr           | 4500                 | [49]      |
| <b>Annual average weather data<sup>a</sup></b>       |                  |                      | [51, 52]  |
| Global irradiation $G^I$                             | W/m <sup>2</sup> | 135                  |           |
| External temperature $T^{\text{ext}}$                | °C               | 10.4                 |           |

<sup>a</sup>demands and weather data are given as annual average; in the model, data for hourly resolution is included from the respective references, <sup>b</sup>yields a city size of 170000 and 85000 inhabitants.

## 64 B Supplementary information on parameter space and the solution 65 synthesis

### 66 B.1 Mathematical formulation and heat exchange characteristics of superstructure 67 optimization problem

68 The mathematical formulation of the superstructure and optimization in the lower level is adapted from  
69 [55, 56], it has also been applied and described in detail in previous studies, such as [1, 57]. The main  
70 aspects are summarized hereafter; for more details, the interested reader may consult the cited references.  
71 For each unit  $u$  in the system, energy and mass flow models are built to describe the conversion in the  
72 unit regarding streams, physical properties, mass, and energy balances, and to obtain the characteristics  
73 of the interfaces offered for integration with other units. Presuming a set of possible units  $\mathbf{U}$  and a set  
74 of possible system states  $\mathbf{T}$ , binary decision variables  $y_u^{\text{use}}$  and  $y_{u,t}^{\text{use}}$  define whether a unit is installed and  
75 whether it is used in timestep  $t$ . Continuous decision variables  $f_u^{\text{mult}}$  and  $f_{u,t}^{\text{mult}}$  describe the size of the  
76 installed unit and the level of usage at which it is operated in each period  $t$ . Continuous variables  $f_u^{\text{mult}}$  are  
77 constrained by parameterized upper and lower bounds  $F_u^{\text{min/max}}$ . Similarly, the binary decision variables  
78  $y_u^{\text{use}}$  and  $y_{u,t}^{\text{use}}$  are limited by  $Y_u$  that determines whether a unit is considered for the generation of results.

79 In the superstructure model, these variables are related to each other by the set of Equations 1- 3.

$$F_u^{\min} \cdot y_u^{\text{use}} \leq f_u^{\text{mult}} \leq F_u^{\max} \cdot y_u^{\text{use}} \quad \forall u \in \mathbf{U} \quad (1)$$

$$F_u^{\min} \cdot y_{u,t}^{\text{use}} \leq f_{u,t}^{\text{mult}} \leq F_u^{\max} \cdot y_{u,t}^{\text{use}} \quad \forall u \in \mathbf{U}, t \in \mathbf{T} \quad (2)$$

$$Y_u \geq y_u^{\text{use}} \geq y_{u,t}^{\text{use}} \quad \forall u \in \mathbf{U}, t \in \mathbf{T} \quad (3)$$

80 Requirements for each resource are satisfied by internal production and imports (Equation 4). The overall  
 81 resource balance ensures that import, export, production, and consumption are balanced in the system, as  
 82 formulated in Equation 5.  $\dot{m}_{re,u,t}^+$  and  $\dot{m}_{re,u,t}^-$  define the reference mass flow rate of resource  $re$  consumed  
 83 (+) and provided (-), respectively, in unit  $u$  at timestep  $t$ . For each unit, the mass balance of streams  
 84 entering and leaving in a timestep  $t$  needs to be closed (Equation 6). It needs to be noted that for clarity  
 85 of the following mass balance formulation, both in and outgoing streams are labeled as resource, with  
 86 the respective sign (+/-) indicating the direction. In the main text of this thesis, outgoing resources  
 87 might be referred to as services (se) provided by the mill. More detailed information on the mathematical  
 88 formulation of the superstructure optimization problem applied in this thesis is provided in [56].

$$\sum_u f_{u,t}^{\text{mult}} \cdot \dot{m}_{re,u,t}^- + \dot{M}_{re,t}^- - \sum_u f_{u,t}^{\text{mult}} \cdot \dot{m}_{re,u,t}^+ \geq 0, \quad \forall re \in \mathbf{RE}, \forall t \in \mathbf{T} \quad (4)$$

$$\sum_u f_{u,t}^{\text{mult}} \cdot \dot{m}_{re,u,t}^+ + \dot{M}_{re,t}^+ - \dot{M}_{re,t}^- - \sum_u f_{u,t}^{\text{mult}} \cdot \dot{m}_{re,u,t}^- = 0, \quad \forall re \in \mathbf{RE}, \forall t \in \mathbf{T} \quad (5)$$

$$\sum_{re} f_{u,t}^{\text{mult}} \cdot (\dot{m}_{re,u,t}^+ - \dot{m}_{re,u,t}^-) = 0, \quad \forall u \in \mathbf{U}, \forall t \in \mathbf{T} \quad (6)$$

89 All units are connected to a utility system, enabling the energy demand and supply profile of each unit  
 90 to be satisfied, considering their respective temperature-enthalpy profiles. Minimum energy requirements  
 91 are calculated applying the Pinch analysis and heat recovery approach presented by Marechal and Kal-  
 92 itventzeff [58], based on the work of Linnhoff and Hindmarsh [59]. The list of all stream inlet and outlet  
 93 temperatures is extracted and ordered to generate the set of temperature intervals  $\mathbf{K}$  of the size  $N^k$  [56].  
 94 The energy balance is closed in each temperature interval  $k$  (Equation 7), and residual heat ( $\dot{R}_{t,k}$ ) flows  
 95 from higher to lower temperature levels. Following thermodynamic feasibility, cascaded heat flows are  
 96 positive, while values in both the first and the last interval are zero (Equation 8).  $\dot{q}_{u,t,k}$  represents the  
 97 reference heat load for unit  $u$  in timestep  $t$  and temperature interval  $k$  [55].

$$\forall k \in \mathbf{K}$$

$$\sum_u \dot{q}_{u,t,k} \cdot f_{u,t}^{\text{mult}} + \dot{R}_{t,k+1} - \dot{R}_{t,k} = 0 \quad \forall t \in \mathbf{T} \quad (7)$$

$$\dot{R}_{t,k} \geq 0, \quad \dot{R}_{t,1} = \dot{R}_{t,N^k+1} = 0 \quad \forall t \in \mathbf{T} \quad (8)$$

98 In this work, the described mixed integer linear programming (MILP) formulation is further enhanced  
 99 by simultaneous optimization of water and energy developed by Kermani et al. [60], where the thermal  
 100 characteristics of water streams are considered for heat integration.

101 Within the mathematical formulation of the optimization problem in the lower-level framework, the energy  
 102 and process models relevant to the superstructure are organized in so-called clusters. Clusters are defined  
 103 as entities that can exchange resources freely among each other, but heat can only be exchanged between  
 104 the different clusters by means of hot water loops or evaporation and condensation of water in the steam  
 105 network [2]. Thus, per cluster, the heat cascade is defined, as described in Section B.1. Table 13 displays  
 106 the organization of process units in different clusters for the analyzed system of combined pulp and fuel  
 107 production, adapted from [2] and enhanced for considering fuel production.

Table 13: Cluster structure in lower-level optimization problem and included process units.

| Cluster digester     | Cluster recovery boiler | Cluster fuel production   |
|----------------------|-------------------------|---------------------------|
| Washing              | Evaporator              | Methanol synthesis        |
| Digester             | Recovery boiler         | DME synthesis             |
| Recausticizer        | Biomass boiler          | SNG production            |
|                      |                         | FT fuel synthesis         |
|                      |                         | Hydrothermal gasification |
|                      |                         | Electrolysis              |
| Cluster pulp machine |                         |                           |
| Pulp machine         |                         |                           |
| Bleaching            |                         |                           |

## 108 B.2 Complexity reduction by means of time series aggregation

109 Time series aggregation (TSA) methods have gained remarkable significance in the modeling and design  
 110 of a wide range of energy system applications where seasonal, daily, or hourly variations in demand,  
 111 supply, or parameter spaces are of importance. A comprehensive review is provided by Hoffmann et al.

112 [61], investigating TSA methods for modeling energy systems. Schütz et al. [62] compare aggregation  
 113 methods based on their performance; it was found that k-medoids is most reliable when approximating  
 114 costs of systems by means of TSA, which is also confirmed by Hoffmann et al. [61].

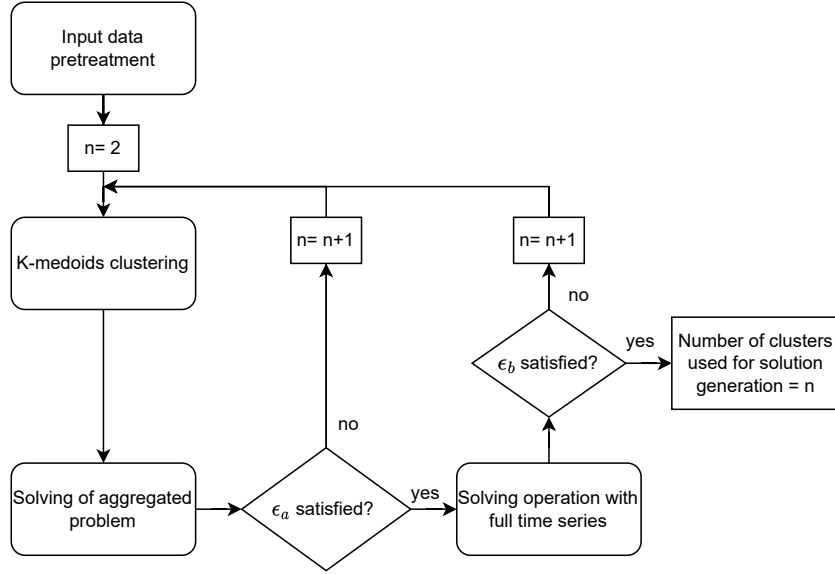

Figure 2: Proposed algorithm for determining the required number of clusters, adapted from Middelhaue et al. [63], Baumgärtner et al. [64] and Bahl et al. [65].

115 For determining the required number of clusters for analyzing the above-described superstructure ad-  
 116 equately, a systematic method for bounding the error of the aggregation in the objective function is  
 117 followed, as proposed by Baumgärtner et al. [64] and Bahl et al. [65] and further developed by Middel-  
 118 haue et al. [63]. In each iteration of the incremental increase of TSA resolution, an upper and lower  
 119 bound of the objectives are evaluated until a convergence criterion on the gap is met. The lower bound  
 120 is derived from solving the relaxed problem, whereas the upper bound is defined as the solution of the  
 121 operating problem in consideration of the complete time series and fixed unit sizes given by the relaxed  
 122 solution [63–65]. Another convergence criterion is considered, in which the relaxed solution of a proposed  
 123 number of clusters  $n$  is compared to the previous solution for  $n - 1$  clusters. Only when a defined con-  
 124 vergence criterion is reached, the operating problem is evaluated for the full-time series, fixing the unit  
 125 decisions to the findings of the relaxed solution. The procedure for TSA is displayed in Figure 2.

### 126 B.3 Parameter sampling and time-dependency

127 For the consumed resources  $re \in RE$  and provided services  $se \in SE$ , the nominal prices displayed in Table  
 128 14 are included. Impact factors are taken from the Ecoinvent database, version 3.6 [66]. As mentioned

129 in the main article, samples are drawn twice from the parameter space, once for solution generation and  
 130 once during solution exploration. For sampling when generating and exploring solutions, latin hypercube  
 131 sampling (LHS) is applied for all parameters that are not assumed to be time-dependent. Table 15 gives  
 132 an overview of the parameter variations considered in both sampling steps, not including time-dependent  
 parameters such as electricity and fuel prices as well as the impact factors of electricity.

Table 14: Nominal values of key economic parameters considered in solution generation and exploration.

| Parameters                               | Unit          | Value  | Reference |
|------------------------------------------|---------------|--------|-----------|
| Interest rate                            | %             | 6      |           |
| Expected lifetime                        | years         | 20     |           |
| Wood price                               | USD/kg        | 0.093  | [67]      |
| Pulp price                               | USD/kg.       | 0.882  | [68]      |
| Electricity price <sup>a</sup>           | USD kWh       | 0.105  | [69]      |
| Natural gas price                        | USD/kWh       | 0.026  | [70]      |
| FT price                                 | USD/kg        | -1.108 | [71]      |
| Methanol price                           | USD/kg        | -0.390 | [72]      |
| DME price                                | USD/kg        | -0.470 | [73]      |
| SNG price                                | USD/kWh       | -0.075 | [74]      |
| H <sub>2</sub> price                     | USD/kg        | -2.500 | [75]      |
| Quicklime price                          | USD/kg        | 0.117  | [76]      |
| Freshwater price                         | USD/kg        | 0.0012 | [77]      |
| Landfill price                           | USD/kg        | 0.0013 | [78]      |
| CO <sub>2</sub> sequestration: transport | USD/kg/250 km | 4      | [79]      |
| CO <sub>2</sub> sequestration: storage   | USD/kg        | 11     | [80]      |
| Waste heat to district heating           | USD/kWh       | 0.075  | [81]      |
| Diesel price <sup>b</sup>                | USD/l         | 1.439  | [82]      |
| Gasoline price <sup>b</sup>              | USD/l         | 1.515  | [82]      |
| Residential heating mix <sup>c</sup>     | USD/kWh       | 0.0689 | [36]      |

<sup>a</sup>annual mean, variation with electricity price from [83], <sup>b</sup>annual mean, variation from WTI crude oil price from [84], <sup>c</sup>current energy mix for heating and cost adapted from [36].

133  
 134 For the time-dependency of energy commodities, the historical behavior of natural gas, electricity, and  
 135 crude oil is considered. In the superstructure model, it is assumed that SNG prices follow trends of natural  
 136 gas, whereas prices of liquid fuels follow the crude oil prices [86]. Annual means and the references for  
 137 time-dependent economic data are provided in Table 14.

138 For including the time-dependent variation in the superstructure model for solution generation, the avail-  
 139 able historical, time-dependent data is varied by two parameters: one that shifts the observed data either  
 140 up or down and one that adds noise to the observed data points. The noise added follows a normal  
 141 distribution with the standard deviation equaling half of the observed standard deviation in the historical



Table 15: Sampling characteristics of parameter space.

| Parameter          | Description                                                                                                                                                                                                                                                                   | Variation <sup>a</sup> |
|--------------------|-------------------------------------------------------------------------------------------------------------------------------------------------------------------------------------------------------------------------------------------------------------------------------|------------------------|
| $p^{\text{un}}(u)$ | Normalized variation of investment cost of unit $u \in U^*$ , $U^* =$ hydrolysis, salt separator, hydrothermal gasification, sulfur removal, CO <sub>2</sub> removal                                                                                                          | $\pm 50$               |
| $p^{\text{un}}(u)$ | Normalized variation of investment cost of unit $u \in U$ , $U =$ electrolysis, co-electrolysis, brine electrolysis, dry biomass pretreatment, gasification, gas conditioning, fuel synthesis reactors (FT, MeOH, DME), SNG synthesis, storage tanks, PV, DHN, mineralization | $\pm 20$ [85]          |
| $i^{\text{un}}(r)$ | Normalized variation of impact of resource $r \in r$ , except for electricity                                                                                                                                                                                                 | $\pm 20$               |
| $r^{\text{un}}(r)$ | Normalized variation of market price of resource $r \in r$ , except for electricity, natural gas, SNG and biofuels <sup>b</sup>                                                                                                                                               | $\pm 20$               |

<sup>a</sup>all parameters sampled with Latin Hypercube Sampling during solution generation and uniformly distributed for solution exploration. Parameters for which time-dependency is acknowledged are not displayed, <sup>b</sup>SNG, natural gas are considered to follow natural gas trends, biofuels are considered to follow crude oil prices.

142 data. The newly-obtained data is clustered based on the required number of clusters determined by TSA  
143 and used as input for each formulated problem solved by the lower-level framework.  
144 To ensure realistic data points are used for result generation, a literature review on correlations between  
145 electricity, crude oil, and natural gas prices is conducted. Historically, natural gas and refined petroleum  
146 products have been used as close substitutes in power generation and industry, leading to natural gas prices  
147 tracking the prices of crude oil [87]. A strategic statistical analysis of the integrated energy market in  
148 Europe is addressed by Bencivenga, Sargenti and D’Ecclesia [87], investigating the short-run relationship  
149 between oil, natural gas, and electricity in the European energy markets, and identifying possible long-run  
150 equilibrium relationships. Correlation analysis presented itself as non-effective due to the non-stationarity  
151 of the data, but cointegration was able to detect a relationship between the individual commodities [87].  
152 In 2014, a report requested by the European Parliament was released, investigating the dependencies in  
153 the European energy market [88]. Electricity prices tend to vary considerably throughout Europe and  
154 generally show a moderate correlation to oil price developments. Different Merit-order curves in different  
155 countries lead to different electricity prices, and market integration into a single electricity market in  
156 Europe has not yet been fully achieved [88]. Generally, oil product prices such as diesel and gasoline are  
157 strongly related to crude oil prices because of the high share of feed-stock costs in their production [88].  
158 The main pathway of high oil prices being translated into gas and electricity prices was originally induced  
159 by the still dominant practice of indexing gas prices to oil prices, prevalent in most gas supply contracts

160 in Europe. It was found that even though gas and oil suppliers share common fundamental price drivers,  
 161 if oil indexation is absent, gas and oil prices are often decoupled [88]. Recently, an increasing share of  
 162 studies has addressed the inter-dependencies of actors in the energy market, especially encouraged by the  
 163 increasing price volatility in the energy commodity markets, addressing risk management in the financial  
 164 sector and the increasing interest in clean energy technology [89–91].

165 To acknowledge both time-dependent price and impact variation and inter-dependencies between com-  
 166 modity prices in this study, the covariance of electricity prices regarding oil, natural gas prices, and  
 167 environmental impact are calculated for different temporal resolutions. Between the electricity price and  
 168 the impact, a positive correlation can be observed, meaning that more expensive electricity can be asso-  
 169 ciated with a higher impact. For the oil and natural gas prices, no strong correlation is observed, even  
 170 though both are mainly driven by the same components [86]. Reasons for this might be the different  
 171 time-resolution of the obtained data, as well as the much more dynamic character of the electricity price  
 172 that makes observations on correlation on an hourly basis challenging. Daily and biannual data reveal  
 173 higher correlations, but since the data set used in this study is supposed to represent typical hours, this  
 174 information is not adequate to draw conclusions.

175 Therefore, a ratio-based approach is applied instead of relying on the covariance, where oil and natural  
 176 gas prices are sampled as previously described. A sample is accepted if the ratios between electricity  
 177 price, gas price, and oil price are within the observed proportions in the historical data set. Obtained  
 178 samples are then used to scale the energy prices included in the superstructure model. The price for SNG  
 179 and natural gas is scaled with the sampled data for natural gas, liquid fuel prices with the crude oil price,  
 180 and electricity prices with the electricity price sample. The applied ratios for acceptance are displayed in  
 181 Table 16.

Table 16: Accepted ratios for sampling commodity prices, based on historical normalized prices.

| <b>Ratios [%]</b> | <b>Electricity price</b> | <b>Oil price</b> | <b>Natural gas price</b> |
|-------------------|--------------------------|------------------|--------------------------|
| Electricity price | 1                        | 40-800           | 90-120                   |
| Oil price         | -                        | 1                | 60-115                   |
| Natural gas price | -                        | -                | 1                        |

## 182 B.4 Country-specific data

183 Country-specific data used to extrapolate the analysis to the European level is provided in Table 17.

Table 17: Country-level data to scale results to European level<sup>a</sup>.

| Country        | M <sup>pulp-</sup> | c <sup>nat.gas</sup> | c <sup>gasoline</sup> | c <sup>diesel</sup> | c <sup>elec</sup> [2019] | e <sup>t,elec</sup> [2019] | c <sup>elec,*b</sup> | e <sup>t,elec,*b</sup>    | Inh. country | Emi <sup>country</sup>   |
|----------------|--------------------|----------------------|-----------------------|---------------------|--------------------------|----------------------------|----------------------|---------------------------|--------------|--------------------------|
| Unit           | kt                 | EUR/kWh              | EUR/l                 | EUR/l               | EUR/kWh                  | g CO <sub>2-eq</sub> /kWh  | EUR/kWh              | g CO <sub>2-eq</sub> /kWh | Mio. capita  | Mio t CO <sub>2-eq</sub> |
| Reference      | [92]               | [70]                 | [82]                  | [82]                | [69]                     | [83]                       | [93]                 | [93]                      | [94]         | [95]                     |
| Belgium        | 1025               | 0.02                 | 1.41                  | 1.32                | 0.08                     | 214.17                     | 0.28                 | 152.16                    | 11.56        | 106.43                   |
| Bulgaria       | 242                | 0.03                 | 1.09                  | 1.11                | 0.09                     | 281.40                     | 0.15                 | 40.94                     | 6.92         | 49.19                    |
| Czechia        | 557                | 0.03                 | 1.24                  | 1.24                | 0.07                     | 763.99                     | 0.19                 | 55.66                     | 10.72        | 113.34                   |
| Germany        | 2326               | 0.03                 | 1.43                  | 1.27                | 0.08                     | 431.31                     | 0.18                 | 54.86                     | 83.20        | 728.74                   |
| Estonia        | 222                | 0.03                 | 1.33                  | 1.32                | 0.08                     | 561.79                     | 0.18                 | 40.24                     | 1.33         | 11.56                    |
| Spain          | 1456               | 0.03                 | 1.29                  | 1.22                | 0.09                     | 224.69                     | 0.14                 | 37.48                     | 47.37        | 274.74                   |
| France         | 1626               | 0.03                 | 1.50                  | 1.44                | 0.08                     | 69.10                      | 0.15                 | 37.19                     | 68.10        | 392.96                   |
| Croatia        | 47                 | 0.03                 | 1.34                  | 1.32                | 0.09                     | 346.72                     | 0.13                 | 34.91                     | 4.04         | 23.76                    |
| Italy          | 334                | 0.03                 | 1.57                  | 1.48                | 0.09                     | 383.81                     | 0.13                 | 34.91                     | 59.33        | 381.25                   |
| Hungary        | 28                 | 0.03                 | 1.17                  | 1.23                | 0.09                     | 375.98                     | 0.24                 | 61.02                     | 9.74         | 62.82                    |
| Netherlands    | 34                 | 0.02                 | 1.65                  | 1.36                | 0.07                     | 530.93                     | 0.21                 | 52.74                     | 17.50        | 164.33                   |
| Austria        | 2090               | 0.03                 | 1.24                  | 1.21                | 0.08                     | 251.44                     | 0.15                 | 27.92                     | 8.93         | 73.60                    |
| Poland         | 1623               | 0.03                 | 1.16                  | 1.17                | 0.07                     | 209.93                     | 0.17                 | 43.33                     | 38.31        | 376.04                   |
| Portugal       | 2745               | 0.03                 | 1.49                  | 1.36                | 0.09                     | 295.27                     | 0.14                 | 35.48                     | 10.31        | 57.56                    |
| Slovenia       | 92                 | 0.03                 | 1.29                  | 1.25                | 0.08                     | 342.80                     | 0.25                 | 84.81                     | 2.11         | 15.85                    |
| Slovakia       | 653                | 0.03                 | 1.33                  | 1.23                | 0.09                     | 399.04                     | 0.11                 | 27.6                      | 5.46         | 37.05                    |
| Finland        | 11 600             | 0.04                 | 1.52                  | 1.41                | 0.06                     | 182.71                     | 0.14                 | 34.49                     | 5.53         | 47.78                    |
| Sweden         | 12 079             | 0.03                 | 1.48                  | 1.51                | 0.07                     | 37.29                      | 0.07                 | 45.98                     | 10.38        | 46.28                    |
| Norway         | 983                | 0.02                 | 1.52                  | 1.42                | 0.07                     | 63.52                      | 0.11                 | 40.24                     | 5.39         | 49.27                    |
| Switzerland    | 92                 | 0.08                 | 1.60                  | 1.74                | 0.07                     | 178.25                     | 0.20                 | 82.01                     | 8.77         | 43.41                    |
| European Union | N/A                | 0.03                 | 1.45                  | 1.36                | 0.08                     | 337.00                     | 0.16                 | 47.54                     | 448.26       | 3298.24                  |
| (EU)           |                    |                      |                       |                     |                          |                            |                      |                           |              |                          |

<sup>a</sup> for fossil fuels, non-country specific environmental impacts (EIs) are assumed, taking cradle-to-gate emission data from Ecoinvent [66] for IPCC 2013, global warming potential (GWP) 100a, and direct emissions from burning fuels into account:  $e_t^{\text{diesel}} = 0.340 \text{ kg CO}_{2\text{-eq}}/\text{kg}$ ,  $e_t^{\text{gasoline}} = 0.309 \text{ kg CO}_{2\text{-eq}}/\text{kg}$ ,  $e_t^{\text{nat.gas}} = 0.277 \text{ kg CO}_{2\text{-eq}}/\text{kg}$ ,  $e_t^{\text{H}_2} = 2.535 \text{ kg CO}_{2\text{-eq}}/\text{kg}$ ,  $b^{**}$  refers to a future, defossilized electrical grid, with characteristics adapted from Santeccchia [93].

## 184 **C Supplementary information on the results**

### 185 **Choice of residential district size**

186 For determining an adequate size of the district to be considered for integration, the performance of  
187 conventional mill operation is analyzed with different district sizes, allowing for no conventional heating  
188 of the district. The sensitivity analysis reveals that for the assumed heating demands (Table 8), a city  
189 size of 170000 inhabitants could theoretically be heated by the mill, given the mill is operating in a  
190 conventional mode without fuel production and other additional process units. For the presented study,  
191 a district size of 85000 is chosen, to allow for the analysis of trade-offs between the provision of different  
192 energy commodities. However, it needs to be noted that the outcomes of the study, specifically the  
193 reported expenses or emission reduction potentials per inhabitant, are largely linked to the assumption  
194 of district size.

### 195 **System configurations**

196 The results of optimization for Perspective S with a district size of 85000 inhabitants is presented in Table  
197 18. The configurations that are selected by the internal optimization and manually are highlighted in  
198 grey.

## 199 **D Design references**

200 Icons for describing the superstructure development were extracted from Flaticon: [www.flaticon.com](http://www.flaticon.com).

## 201 **Glossary**

202 **CFB** circulating fluidized bed.

203 **DHN** district heating network.

204 **DME** dimethyl ether.

205 **EI** environmental impact.

206 **ENF** entrained flow.

207 **EU** European Union.

Table 18: Results of system analysis with district size of 85000 capita.

| ID | $\eta^{\text{self,electricity}}$ | $\eta^{\text{self,transport}}$ | $\eta^{\text{self,heating}}$ | $\eta^{\text{self,combined}}$ | S1   | S12   | $c^{\text{avoidance}}$ | $\Delta\text{EI}/\text{cap}$ | $\Delta\text{TOTEX}/\text{cap}$ |
|----|----------------------------------|--------------------------------|------------------------------|-------------------------------|------|-------|------------------------|------------------------------|---------------------------------|
|    | %                                | %                              | %                            | %                             | %    | %     | USD/t $\text{CO}_2$    | kg $\text{CO}_2$             | USD                             |
| 0  | 41.3                             | 60.1                           | 46.3                         | 51.3                          | 46.4 | 328.3 | 9.3                    | 654.4                        | 6.1                             |
| 1  | 44.8                             | 9.8                            | 46.9                         | 36.0                          | 18.5 | 394.9 | -52.9                  | 787.3                        | -41.7                           |
| 2  | 44.3                             | 11.1                           | 47.0                         | 36.3                          | 18.7 | 343.4 | -106.2                 | 684.6                        | -72.7                           |
| 3  | 43.3                             | 56.9                           | 44.5                         | 49.5                          | 47.3 | 300.1 | -88.0                  | 598.3                        | -52.6                           |
| 4  | 42.6                             | 69.7                           | 44.0                         | 52.9                          | 51.3 | 318.1 | -84.6                  | 634.2                        | -53.7                           |
| 5  | 44.1                             | 91.1                           | 40.7                         | 57.8                          | 59.1 | 404.2 | 25.5                   | 805.8                        | 20.5                            |
| 6  | 43.0                             | 58.3                           | 44.4                         | 49.8                          | 47.6 | 355.2 | -81.3                  | 708.0                        | -57.5                           |
| 7  | 42.5                             | 69.4                           | 44.0                         | 52.8                          | 51.2 | 347.1 | -71.7                  | 692.0                        | -49.6                           |
| 8  | 42.4                             | 67.4                           | 44.3                         | 52.4                          | 50.5 | 289.4 | -136.5                 | 576.9                        | -78.7                           |
| 9  | 44.7                             | 50.4                           | 44.0                         | 47.7                          | 45.6 | 408.6 | 5.1                    | 814.6                        | 4.1                             |
| 10 | 44.8                             | 7.0                            | 46.5                         | 35.0                          | 17.1 | 444.7 | -61.6                  | 886.5                        | -54.6                           |
| 11 | 44.7                             | 9.2                            | 46.7                         | 35.7                          | 18.1 | 369.0 | -68.3                  | 735.7                        | -50.2                           |
| 12 | 44.6                             | 7.0                            | 50.8                         | 37.3                          | 16.7 | 469.8 | -6.2                   | 936.6                        | -5.8                            |
| 13 | 53.8                             | 3.7                            | 40.1                         | 33.7                          | 21.8 | 496.3 | 230.4                  | 989.5                        | 227.9                           |
| 14 | 82.2                             | 0.2                            | 26.5                         | 29.3                          | 39.1 | 550.0 | 920.2                  | 1096.4                       | 1008.9                          |
| 15 | 43.5                             | 100.0                          | 40.9                         | 60.5                          | 62.3 | 434.9 | 52.6                   | 867.0                        | 45.6                            |
| 16 | 43.5                             | 100.0                          | 41.8                         | 60.8                          | 62.7 | 441.0 | 72.0                   | 879.2                        | 63.3                            |
| 17 | 52.7                             | 100.0                          | 36.9                         | 57.2                          | 69.7 | 469.0 | 328.0                  | 935.0                        | 306.7                           |
| 18 | 50.5                             | 100.0                          | 38.1                         | 57.9                          | 67.8 | 464.7 | 275.9                  | 926.4                        | 255.6                           |
| 19 | 82.2                             | 100.0                          | 24.8                         | 47.2                          | 89.3 | 525.5 | 1014.7                 | 1047.5                       | 1062.9                          |
| 20 | 82.2                             | 100.0                          | 24.8                         | 47.2                          | 89.3 | 525.5 | 1024.7                 | 1047.6                       | 1073.5                          |

Table 19: Author acknowledgments of icons from Flaticon.

| <b>Icons</b>                                                                                | Author's website hyper-link         |
|---------------------------------------------------------------------------------------------|-------------------------------------|
| Solar panel icon, electric pole icon, worker icon, boiler icon, paper stack icon, tree icon | <a href="#">Freepik</a>             |
| Bus icon                                                                                    | <a href="#">Hight Quality Icons</a> |
| Car icon                                                                                    | <a href="#">fjstudio</a>            |
| Electric car icon, truck icon                                                               | <a href="#">ksonian</a>             |
| House icon                                                                                  | <a href="#">Kiranshastry</a>        |
| Building icon, power generation icon                                                        | <a href="#">Smashicons</a>          |
| Fuel icon                                                                                   | <a href="#">Those Icons</a>         |
| Factory icon                                                                                | <a href="#">monkik</a>              |
| People icon                                                                                 | <a href="#">Vitaly Gorbachev</a>    |
| Solar panel icon                                                                            | <a href="#">Khoirul Huda</a>        |

208 **FICFB** fast internally circulating fluidized bed.

209 **FT** Fischer-Tropsch.

210 **GWP** global warming potential.

211 **LHS** latin hypercube sampling.

212 **LHV** lower heating value.

213 **MEA** monoethanolamine.

214 **MILP** mixed integer linear programming.

215 **SNG** synthetic natural gas.

216 **TSA** time series aggregation.

217 **WGS** water gas shift.

## 218 References

- 219 [1] J Granacher, TV Nguyen, R Castro-Amoedo, EC McDonald and F Maréchal. “Enhancing biomass  
220 utilization by combined pulp and fuel production”. In: *Frontiers in Energy Research* 10 (2022).
- 221 [2] M Kermani, ID Kantor, AS Wallerand, J Granacher, AV Ensinas and F Maréchal. “A Holistic  
222 Methodology for Optimizing Industrial Resource Efficiency”. en. In: *Energies* 12.7 (Jan. 2019),  
223 p. 1315.
- 224 [3] K Pettersson and S Harvey. “Comparison of black liquor gasification with other pulping biorefinery  
225 concepts – Systems analysis of economic performance and CO2 emissions”. In: *Energy*. 7th Biennial  
226 International Workshop “Advances in Energy Studies” 37.1 (Jan. 2012), pp. 136–153.
- 227 [4] TN Adams. *Lime kiln principles and operations*. en. Tech. rep. Seattle: Tappi, 2007, p. 15.
- 228 [5] DR Sanchez. *Recausticizing - Principles and Practice*. en. Tech. rep. Orlando, FL: Tappi, 2000,  
229 p. 30.
- 230 [6] AdS Castro and LS Figueiredo. “Optimization of lime kilns based on strategies of advanced process  
231 control - case study Cenibra”. en. In: *5 th International Colloquium on Eucalyptus Pulp*. Bahia,  
232 Brazil, May 2011, p. 10.
- 233 [7] J Gullichsen and CJ Fogelholm. *Chemical Pulping, Part 2*. en. Papermaking science and technology.  
234 Fapet Oy, 1999.
- 235 [8] Per Lundqvist. “Mass and energy balances over the lime kiln in a kraft pulp mill”. en. PhD thesis.  
236 2009.
- 237 [9] M Gassner, F Vogel, G Heyen and F Maréchal. “Optimal process design for the polygeneration  
238 of SNG, power and heat by hydrothermal gasification of waste biomass: Process optimisation for  
239 selected substrates”. en. In: *Energy & Environmental Science* 4.5 (Apr. 2011), pp. 1742–1758.
- 240 [10] JA Onwudili and PT Williams. “Hydrothermal reactions of sodium formate and sodium acetate  
241 as model intermediate products of the sodium hydroxide-promoted hydrothermal gasification of  
242 biomass”. en. In: *Green Chemistry* 12.12 (2010). Number: 12, p. 2214.
- 243 [11] M Magdeldin and M Järvinen. “Supercritical water gasification of Kraft black liquor: Process design,  
244 analysis, pulp mill integration and economic evaluation”. en. In: *Applied Energy* 262 (Mar. 2020),  
245 p. 114558.

- 246 [12] M Schubert, J Aubert, JB Müller and F Vogel. “Continuous salt precipitation and separation from  
247 supercritical water. Part 3: Interesting effects in processing type 2 salt mixtures”. en. In: *The Journal*  
248 *of Supercritical Fluids* 61 (Jan. 2012), pp. 44–54.
- 249 [13] JS Luterbacher, M Fröling, F Vogel, F Maréchal and JW Tester. “Hydrothermal Gasification of  
250 Waste Biomass: Process Design and Life Cycle Assessment”. In: *Environmental Science & Technology*  
251 43.5 (Mar. 2009), pp. 1578–1583.
- 252 [14] M Magdeldin, T Kohl and M Järvinen. “Process modeling, synthesis and thermodynamic evaluation  
253 of hydrogen production from hydrothermal processing of lipid extracted algae integrated with a  
254 downstream reformer conceptual plant”. en. In: *Biofuels* 7.2 (Mar. 2016). Number: 2, pp. 97–116.
- 255 [15] A Mian, AV Ensinas and F Marechal. “Multi-objective optimization of SNG production from mi-  
256 croalgae through hydrothermal gasification”. en. In: *Computers & Chemical Engineering* 76 (May  
257 2015), pp. 170–183.
- 258 [16] K Özdenkçi, C De Blasio, G Sarwar, K Melin, J Koskinen and V Alopaeus. “Techno-economic fea-  
259 sibility of supercritical water gasification of black liquor”. en. In: *Energy* 189 (Dec. 2019), p. 116284.
- 260 [17] C Cao, L Guo, H Jin, W Cao, Y Jia and X Yao. “System analysis of pulping process coupled with  
261 supercritical water gasification of black liquor for combined hydrogen, heat and power production”.  
262 In: *Energy* 132 (May 2017).
- 263 [18] AM Ribeiro, CA Grande, FV Lopes, JM Loureiro and AE Rodrigues. “A parametric study of  
264 layered bed PSA for hydrogen purification”. en. In: *Chemical Engineering Science* 63.21 (Nov.  
265 2008). Number: 21, pp. 5258–5273.
- 266 [19] M Magdeldin, T Kohl, C De Blasio, M Järvinen, S Won Park and R Giudici. “The BioSCWG Pro-  
267 ject: Understanding the Trade-Offs in the Process and Thermal Design of Hydrogen and Synthetic  
268 Natural Gas Production”. en. In: *Energies* 9.10 (Oct. 2016). Number: 10, p. 838.
- 269 [20] D Chiche and JM Schweitzer. “Investigation of competitive COS and HCN hydrolysis reactions  
270 upon an industrial catalyst: Langmuir-Hinshelwood kinetics modeling”. en. In: *Applied Catalysis B:*  
271 *Environmental* 205 (May 2017), pp. 189–200.
- 272 [21] Markus Lesemann. *RTI and Eastman Chemical Demonstrate Warm-Temperature Syngas Cleanup*  
273 *Technology*. en. Tech. rep. RTI International, 2013, p. 4.
- 274 [22] DL Denton, R Gupta, M Lesemann and B Turk. *RTI Warm Syngas Cleanup Technology Demon-*  
275 *stration*. en. 2016.



- 276 [23] AD Celebi, S Sharma, AV Ensinas and F Maréchal. “Next generation cogeneration system for  
277 industry – Combined heat and fuel plant using biomass resources”. In: *Chemical Engineering Science*  
278 204 (Aug. 2019), pp. 59–75.
- 279 [24] E Peduzzi. “Biomass To Liquids”. en. PhD thesis. Switzerland: EPFL, 2015.
- 280 [25] M Gassner and F Maréchal. “Thermo-economic process model for thermochemical production of  
281 Synthetic Natural Gas (SNG) from lignocellulosic biomass”. en. In: *Biomass and Bioenergy* 33.11  
282 (Nov. 2009), pp. 1587–1604.
- 283 [26] L Tock, M Gassner and F Maréchal. “Thermochemical production of liquid fuels from biomass:  
284 Thermo-economic modeling, process design and process integration analysis”. en. In: *Biomass and*  
285 *Bioenergy* 34.12 (2010), pp. 1838–1854.
- 286 [27] S Heyne and S Harvey. “Impact of choice of CO<sub>2</sub> separation technology on thermo-economic per-  
287 formance of Bio-SNG production processes”. en. In: *International Journal of Energy Research* 38.3  
288 (2014), pp. 299–318.
- 289 [28] G Matute, J Yusta and L Correas. “Techno-economic modelling of water electrolyzers in the range  
290 of several MW to provide grid services while generating hydrogen for different applications: A case  
291 study in Spain applied to mobility with FCEVs”. en. In: *International Journal of Hydrogen Energy*  
292 44.33 (July 2019). Number: 33, pp. 17431–17442.
- 293 [29] X Zhang, Y Song, G Wang and X Bao. “Co-electrolysis of CO<sub>2</sub> and H<sub>2</sub>O in high-temperature solid  
294 oxide electrolysis cells: Recent advance in cathodes”. en. In: *Journal of Energy Chemistry. CO<sub>2</sub>*  
295 *Capture Storage and Utilization* 26.5 (Sept. 2017), pp. 839–853.
- 296 [30] R Suciú, P Stadler, A Ashouri and F Maréchal. “Towards energy-autonomous cities using CO<sub>2</sub>  
297 networks and Power to Gas storage”. In: *Proceedings of ECOS 2016*. Postoroz, Slovenia, 2016.
- 298 [31] H Ostovari, A Sternberg and A Bardow. “Rock ‘n’ use of CO<sub>2</sub>: carbon footprint of carbon capture  
299 and utilization by mineralization”. en. In: *Sustainable Energy & Fuels* 4.9 (2020). Publisher: Royal  
300 Society of Chemistry, pp. 4482–4496.
- 301 [32] AC Spínola, CT Pinheiro, AGM Ferreira and LM Gando-Ferreira. “Mineral carbonation of a pulp  
302 and paper industry waste for CO<sub>2</sub> sequestration”. en. In: *Process Safety and Environmental Pro-*  
303 *tection* 148 (Apr. 2021), pp. 968–979.

- 304 [33] R Castro-Amoedo, J Granacher, MA Daher and F Marechal. “On the role of system integration of  
305 carbon capture and mineralization in achieving net-negative emissions in industrial sectors”. en. In:  
306 *Energy & Environmental Science* (July 2023). Publisher: The Royal Society of Chemistry.
- 307 [34] J Sipilä, S Teir and R Zevenhoven. *Carbon Dioxide Sequestration by Mineral Carbonation: Literature  
308 Review Update 2005–2007*. Tech. rep. Abo Akademi University, Jan. 2008.
- 309 [35] European Technology Platform for Zero Emissions in Fossil Fuel Power Plants. *The costs of CO2  
310 transport: post-demonstration CCS in the EU*. en-AU. Tech. rep. Brussels, Belgium, 2011.
- 311 [36] RA Suci. “Fifth generation district energy systems for low carbon cities”. eng. PhD thesis. Lausanne:  
312 EPFL, 2019.
- 313 [37] F Belfiore. “District heating and cooling systems to integrate renewable energy in urban areas”.  
314 eng. PhD thesis. Lausanne: EPFL, 2021.
- 315 [38] V Masatin, E Latõšev and A Volkova. “Evaluation Factor for District Heating Network Heat Loss  
316 with Respect to Network Geometry”. en. In: *Energy Procedia*. International Scientific Conference  
317 “Environmental and Climate Technologies”, CONECT 2015 95 (Sept. 2016), pp. 279–285.
- 318 [39] S Henchoz, C Weber, F Maréchal and D Favrat. “Performance and profitability perspectives of  
319 a CO2 based district energy network in Geneva’s City Centre”. en. In: *Energy* 85 (June 2015),  
320 pp. 221–235.
- 321 [40] P Stadler, L Girardin, A Ashouri and F Maréchal. “Contribution of Model Predictive Control in the  
322 Integration of Renewable Energy Sources within the Built Environment”. In: *Frontiers in Energy  
323 Research* 6 (2018).
- 324 [41] L Girardin, F Marechal, M Dubuis, N Calame-Darbellay and D Favrat. “EnerGis: A geographical  
325 information based system for the evaluation of integrated energy conversion systems in urban areas”.  
326 en. In: *Energy*. ECOS 2008 35.2 (Feb. 2010), pp. 830–840.
- 327 [42] Federal Statistical Office. *Energy sector*. en. 2022.
- 328 [43] EK Vakkilainen. “Steam Generation from Biomass, chapter 3: Boiler process”. en. In: *Steam Gen-  
329 eration from Biomass*. Ed. by EK Vakkilainen. Butterworth-Heinemann, Jan. 2017, pp. 57–86.
- 330 [44] A Ashouri. “Simultaneous Design and Control of Energy Systems”. en. Accepted: 2017-10-04T08:17:55Z.  
331 Doctoral Thesis. ETH Zurich, 2014.
- 332 [45] T Elghozi. *How to calculate the indicators for the transport sector*. en. 2021.

- 333 [46] L Calearo, M Marinelli and C Ziras. “A review of data sources for electric vehicle integration  
334 studies”. en. In: *Renewable and Sustainable Energy Reviews* 151 (Nov. 2021), p. 111518.
- 335 [47] International Energy Agency. *Vehicle fuel economy in major markets 2005-2019*. en. Tech. rep.  
336 International Energy Agency, 2021.
- 337 [48] J Szargut, DR Morris and FR Steward. *Exergy analysis of thermal, chemical, and metallurgical  
338 processes*. English. Berlin, Heidelberg: Springer, 1988.
- 339 [49] Eurostat. *Road traffic by type of vehicle*. 2022.
- 340 [50] International Energy Agency. *Net Zero by 2050 - A Roadmap for the Global Energy Sector*. en.  
341 Tech. rep. International Energy Agency, 2021, p. 224.
- 342 [51] L Middelhaue. “On the role of districts as renewable energy hubs”. eng. PhD thesis. Lausanne:  
343 EPFL, 2022.
- 344 [52] PM Stadler. “Model-based sizing of building energy systems with renewable sources”. eng. PhD  
345 thesis. Lausanne: EPFL, 2019.
- 346 [53] Cedric Terrier, Luise Middelhaue and François Maréchal. “Potential of electric mobility as service  
347 to the grid in renewable energy hubs”. In: *Proceedings of ECOS 2022 - The 35th International  
348 Conference on Efficiency, Cost, Optimization, Simulation and Environmental Impact of Energy  
349 Systems*. Vol. 35. Copenhagen, Denmark, 2022.
- 350 [54] Eurostat. *Territorialised road freight transport, by transport coverage – annual data*. 2022.
- 351 [55] M Gassner and F Maréchal. “Methodology for the optimal thermo-economic, multi-objective design  
352 of thermochemical fuel production from biomass”. In: *Computers & Chemical Engineering*. Selec-  
353 ted Papers from the 17th European Symposium on Computer Aided Process Engineering held in  
354 Bucharest, Romania, May 2007 33.3 (Mar. 2009), pp. 769–781.
- 355 [56] I Kantor, JL Robineau, H Bütün and F Maréchal. “A Mixed-Integer Linear Programming Formula-  
356 tion for Optimizing Multi-Scale Material and Energy Integration”. In: *Frontiers in Energy Research*  
357 8 (2020), p. 49.
- 358 [57] R Castro-Amoedo, N Morisod, J Granacher and F Maréchal. “The Role of Biowaste: A Multi-  
359 Objective Optimization Platform for Combined Heat, Power and Fuel”. In: *Frontiers in Energy  
360 Research* 9 (2021), p. 417.

- 361 [58] F Marechal and B Kalitventzeff. “Process integration: Selection of the optimal utility system”. In:  
362 *Computers & Chemical Engineering*. European Symposium on Computer Aided Process Engineering-  
363 8 22 (Mar. 1998), S149–S156.
- 364 [59] B Linnhoff and E Hindmarsh. “The pinch design method for heat exchanger networks”. In: *Chemical*  
365 *Engineering Science* 38.5 (1983). 00000, pp. 745–763.
- 366 [60] M Kermani, Z Perin-Levasseur, M Benali, L Savulescu and F Marechal. “A novel MILP approach for  
367 simultaneous optimization of water and energy: Application to a Canadian softwood Kraft pulping  
368 mill”. en. In: *Computers & Chemical Engineering* 102 (2017), pp. 238–257.
- 369 [61] M Hoffmann, L Kotzur, D Stolten and M Robinius. “A Review on Time Series Aggregation Methods  
370 for Energy System Models”. en. In: *Energies* 13.3 (Jan. 2020). Number: 3 Publisher: Multidiscip-  
371 linary Digital Publishing Institute, p. 641.
- 372 [62] T Schütz, MH Schraven, M Fuchs, P Remmen and D Müller. “Comparison of clustering algorithms  
373 for the selection of typical demand days for energy system synthesis”. en. In: *Renewable Energy* 129  
374 (Dec. 2018), pp. 570–582.
- 375 [63] L Middelhaue, N Ljubic, J Granacher, L Girardin and F Maréchal. “Data reduction for mixed  
376 integer linear programming in complex energy systems”. In: *Proceedings of ECOS 2021*. 2021.
- 377 [64] N Baumgärtner, B Bahl, M Hennen and A Bardow. “RiSES3: Rigorous Synthesis of Energy Supply  
378 and Storage Systems via time-series relaxation and aggregation”. en. In: *Computers & Chemical*  
379 *Engineering* 127 (Aug. 2019), pp. 127–139.
- 380 [65] B Bahl, A Kümpel, H Seele, M Lampe and A Bardow. “Time-series aggregation for synthesis  
381 problems by bounding error in the objective function”. In: *Energy* 135 (2017), pp. 900–912.
- 382 [66] G Wernet, C Bauer, B Steubing, J Reinhard, E Moreno-Ruiz and B Weidema. “Theecoinvent  
383 database version 3 (part I): overview and methodology”. en. In: *The International Journal of Life*  
384 *Cycle Assessment* 21.9 (Sept. 2016), pp. 1218–1230.
- 385 [67] Food and Agriculture Organization of the United Nations. *Forest Products Annual Market Review,*  
386 *2018-2019*. Tech. rep. ECE/TIM/SP/48. ISBN: 978-92-1-117218-8. United Nations, 2019.
- 387 [68] Index Mundi. *Wood Pulp - Monthly Price*. 2022.
- 388 [69] Eurostat. *Electricity prices for non-household consumers - bi-annual data*. 2022.
- 389 [70] Eurostat. *Gas prices for non-household consumers - bi-annual data*. 2022.

- 390 [71] I Landälv, K Maniatis, Evd Heuvel, S Kalligeros and L Waldheim. *Building up the future, cost*  
391 *of biofuel : sub group on advanced biofuels : sustainable transport forum*. en. Brussels, Belgium:  
392 Publications Office of the European Union, June 2018.
- 393 [72] Methanex. *Methanex Monthly Average Regional Posted Contract Price History*. 2021.
- 394 [73] P Zeman, V Hönig, P Procházka and J Mařík. “Dimethyl ether as a renewable fuel for diesel  
395 engines”. en. In: *Agronomy Research* 15 (2017).
- 396 [74] J Gorre, F Ortloff and C van Leeuwen. “Production costs for synthetic methane in 2030 and 2050  
397 of an optimized Power-to-Gas plant with intermediate hydrogen storage”. en. In: *Applied Energy*  
398 253 (Nov. 2019), p. 113594.
- 399 [75] International Energy Agency. *The Future of Hydrogen*. en-GB. Technology Report. Paris, France:  
400 International Energy Agency, June 2019, p. 203.
- 401 [76] Index Mundi. *Lime Prices In The United States, By Type*. 2022.
- 402 [77] European Association of Public Water Operators. *Water affordability*. Tech. rep. Brussels: European  
403 Association of Public Water Operators, 2016.
- 404 [78] Valmet. *The modern white liquor plant*. Tech. rep. Valmet, 2017.
- 405 [79] International Energy Agency. *Special Report on Carbon Capture Utilisation and Storage: CCUS in*  
406 *clean energy transitions*. en. Tech. rep. International Energy Agency, 2020, p. 174.
- 407 [80] WJ Schmelz, G Hochman and KG Miller. “Total cost of carbon capture and storage implemented at  
408 a regional scale: northeastern and midwestern United States”. In: *Interface Focus* 10.5 (Oct. 2020),  
409 p. 20190065.
- 410 [81] G Gullberg, F Ericson and M Eck. *The French District Heating Market – Overview, Opportunities*  
411 *and Challenges*. en. Tech. rep. Swedish Energy Agency, 2019, p. 33.
- 412 [82] European Commission. *Weekly Oil Bulletin*. en. 2022.
- 413 [83] Entsoe. *European association for the cooperation of transmission system operators for electricity*.  
414 en-us. 2022.
- 415 [84] Macrotrends LLC. *WTI Crude Oil Prices - 10 Year Daily Chart — MacroTrends*. 2023.
- 416 [85] GA Buchner, AW Zimmermann, AE Hohgräve and R Schomäcker. “Techno-economic Assessment  
417 Framework for the Chemical Industry—Based on Technology Readiness Levels”. In: *Industrial &*  
418 *Engineering Chemistry Research* 57.25 (June 2018), pp. 8502–8517.

- 419 [86] US Energy Information Administration. *Factors affecting natural gas prices - U.S. Energy Inform-*  
420 *ation Administration (EIA)*. 2022.
- 421 [87] C Bencivenga, G Sargenti and RL D’Ecclesia. “Energy markets: crucial relationship between prices”.  
422 en. In: *Mathematical and Statistical Methods for Actuarial Sciences and Finance*. Ed. by M Corazza  
423 and C Pizzi. Milano: Springer Milan, 2010, pp. 23–32.
- 424 [88] U Albrecht, M Altmann, J Zerhusen, T Rakhsa, P Maio, A Beaudet, P Trucco, C Egenhofer, A  
425 Behrens, J Teusch, J Wiczorkiewicz, F Genoese and G Maisonnier. *The impact of the oil price on*  
426 *EU energy prices*. Tech. rep. Policy Department European Parliament, 2014.
- 427 [89] T Kanamura. “A model of price correlations between clean energy indices and energy commodities”.  
428 In: *Journal of Sustainable Finance & Investment* 12.2 (Apr. 2022), pp. 319–359.
- 429 [90] MU Rehman. “Dynamic correlation pattern amongst alternative energy market for diversification  
430 opportunities”. In: *Journal of Economic Structures* 9.1 (Feb. 2020), p. 16.
- 431 [91] N Lange. “Correlation in Energy Markets”. en. PhD thesis. Frederiksberg: Copenhagen Business  
432 School, 2017.
- 433 [92] Eurostats. *Pulp, paper and paperboard*. 2022.
- 434 [93] A Santecchia. “Enabling renewable Europe through optimal design and operation”. eng. PhD thesis.  
435 Lausanne: EPFL, 2022.
- 436 [94] Eurostat. *Population and employment*. 2023.
- 437 [95] European Environment Agency. *EEA greenhouse gases*. en. Dashboard (Tableau). 2022.
